# Supplementary material for: PEI@Mg2SiO4: an efficient carbon dioxide and nitrophenol compounds adsorbing material
Source: Royal Society of Chemistry journal article supplement (doi:10.1039/c4ra04928d), 2014-01-01
Supplement: c4ra04928d1.pdf [file c4ra04928d1.pdf]

Electronic Supplementary Information (ESI)

## PEI@Mg<sub>2</sub>SiO<sub>4</sub>: an efficient carbon dioxide and nitrophenol compounds adsorbing material

### A table of contents entry

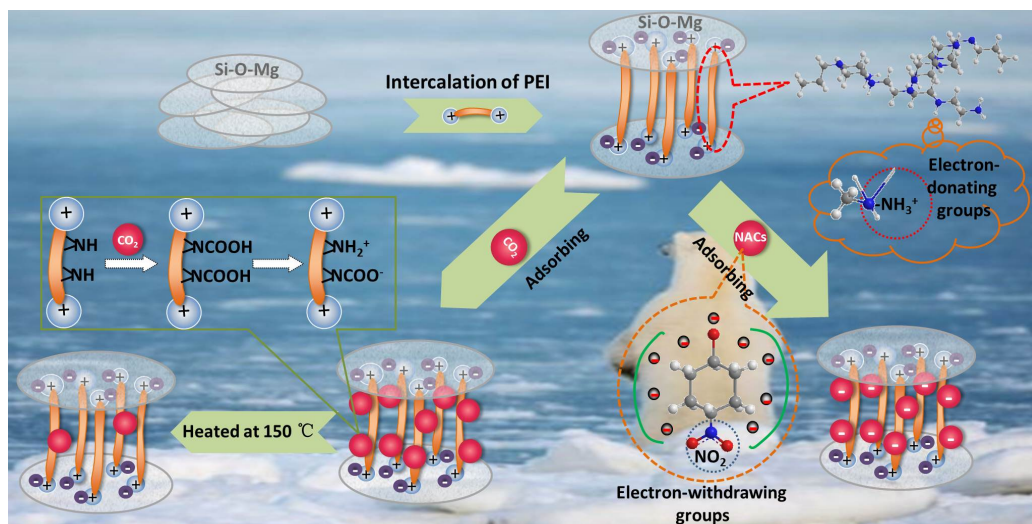

PEI@Mg<sub>2</sub>SiO<sub>4</sub>: an efficient carbon dioxide and nitrophenol compounds adsorbing material

Figures S1 – S3 and Table S1

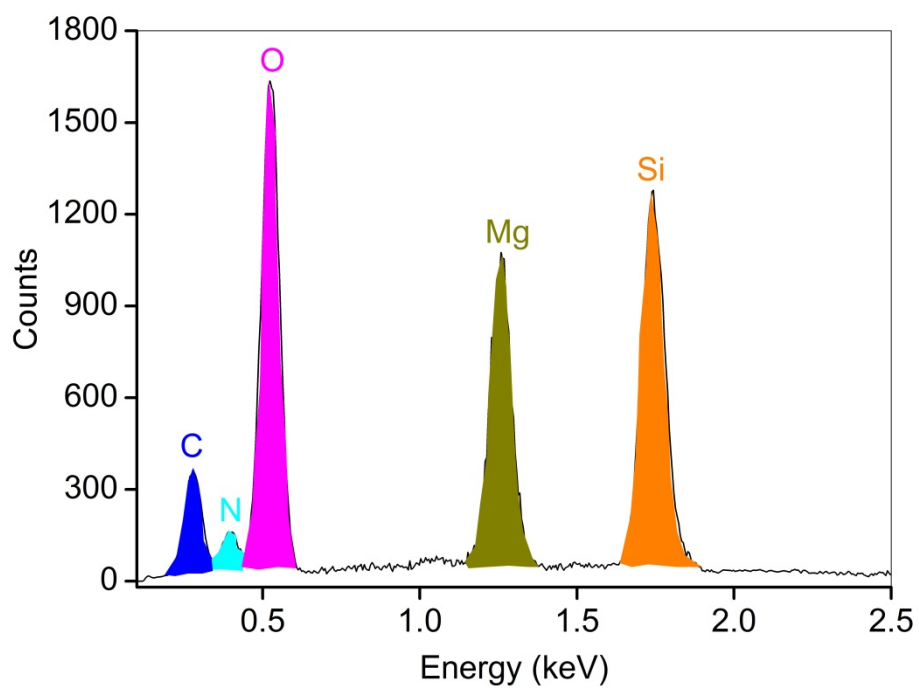

Fig. S1 EDX of the PEI@Mg<sub>2</sub>SiO<sub>4</sub>.

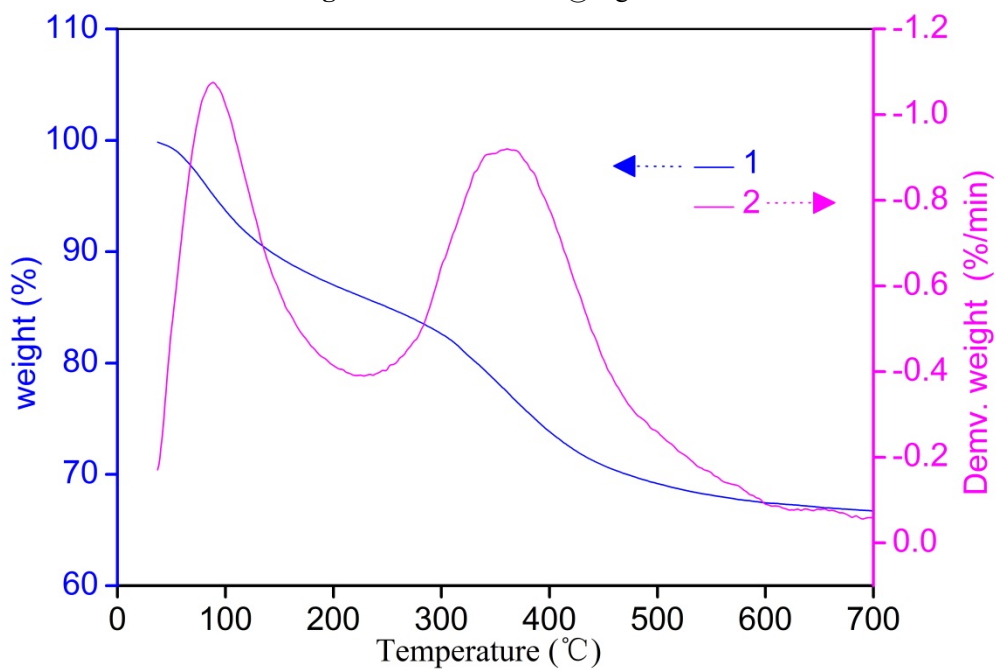

Fig. S2 TGA (1) and DTA (2) of the PEI@Mg<sub>2</sub>SiO<sub>4</sub>.

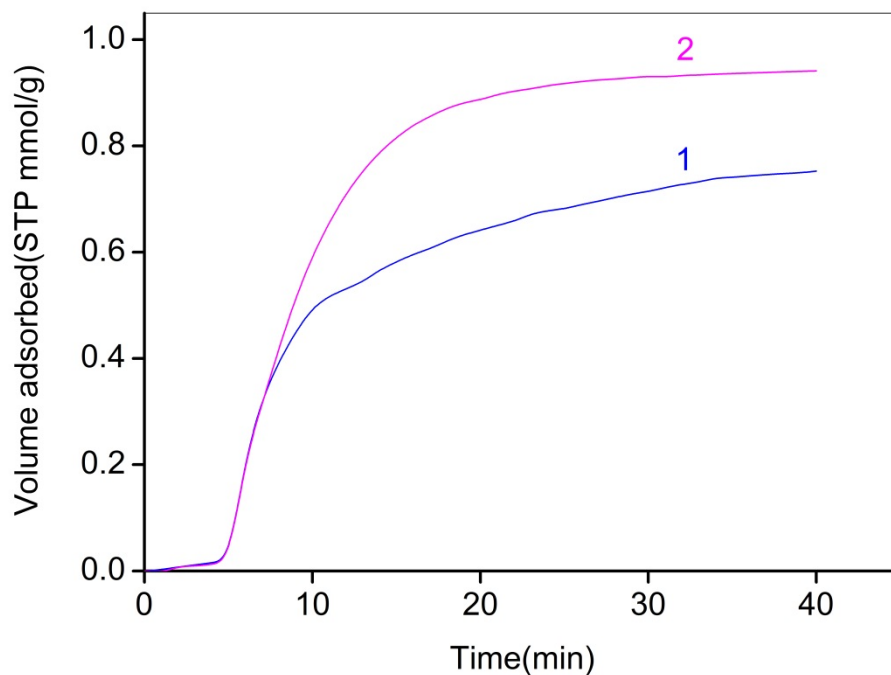

**Fig. S3** Effect of time on the adsorption of CO<sub>2</sub> for Mg<sub>2</sub>SiO<sub>4</sub> (1) and the PEI@Mg<sub>2</sub>SiO<sub>4</sub> (2) at 50 °C.

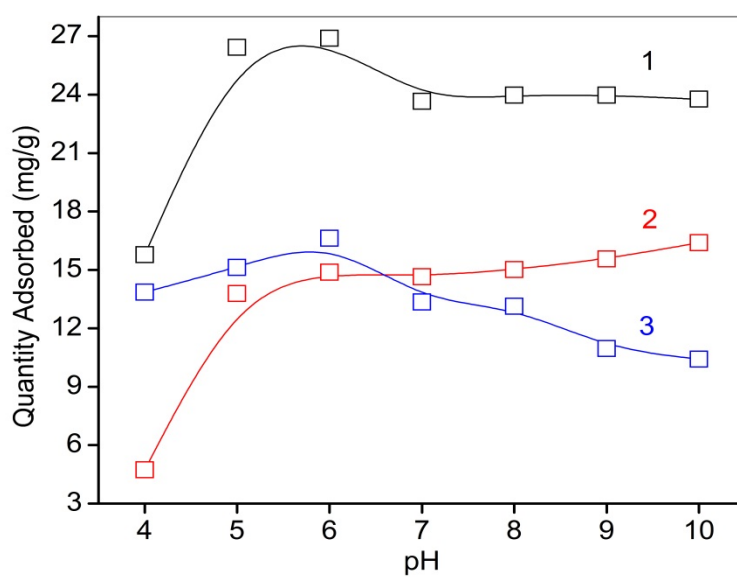

**Fig. S4** The sorption curve of NACs (1-NP, 2-DNP and 3-TNP) to the PEI@Mg<sub>2</sub>SiO<sub>4</sub> material at different pH.

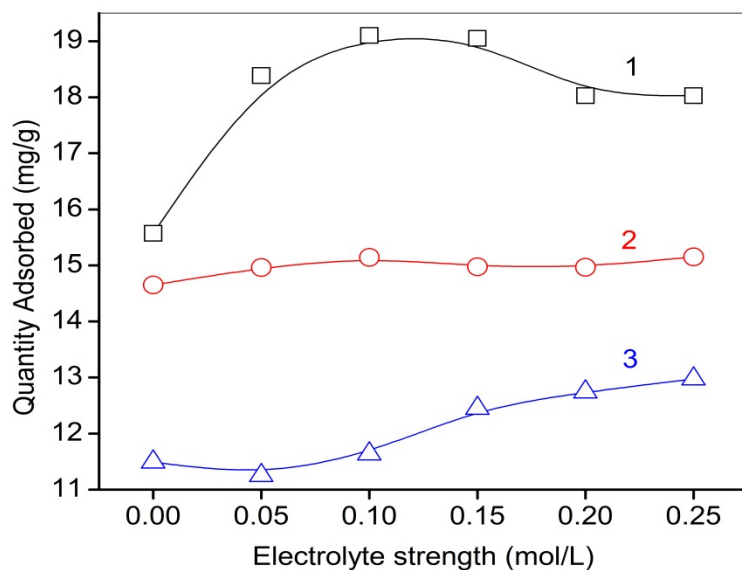

**Fig. S5** Effect of ionic strength on the adsorption of NACs (1-NP, 2-DNP and 3-TNP) to the PEI@Mg<sub>2</sub>SiO<sub>4</sub> material

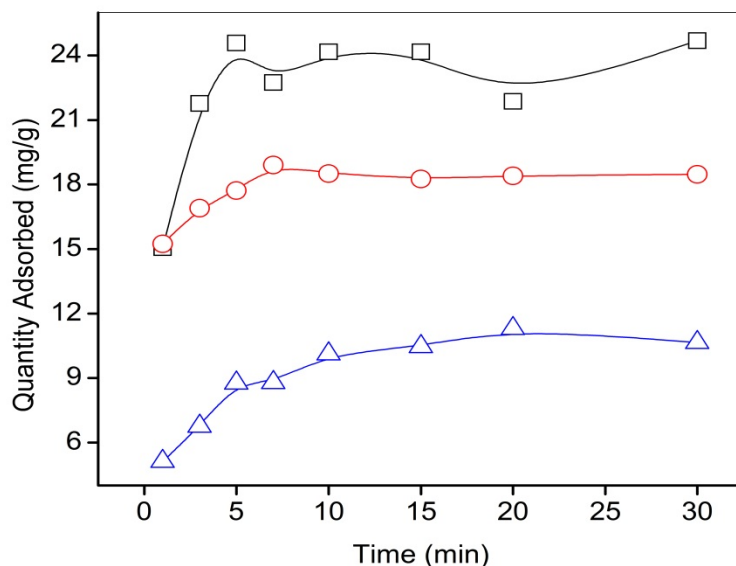

**Fig. S6** The sorption curve of NACs (1-NP, 2-DNP and 3-TNP) to the PEI@Mg<sub>2</sub>SiO<sub>4</sub> material at different times

**Table. S1** Parameters of the DEM Kinetic Model obtained for CO<sub>2</sub> adsorption on the PEI@Mg<sub>2</sub>SiO<sub>4</sub>

| Temperature (°C) | $q_e$ (mg/g) | Fast adsorption |                            | Slow adsorption |                            | R <sup>2</sup> |
|------------------|--------------|-----------------|----------------------------|-----------------|----------------------------|----------------|
|                  |              | $D_1$ (mg/g)    | $K_1$ (min <sup>-1</sup> ) | $D_2$ (mg/g)    | $K_2$ (min <sup>-1</sup> ) |                |
| 25               | 35.6         | 18.4            | 0.32                       | 17.5            | 0.06                       | 0.99           |
| 50               | 42.3         | 24.1            | 0.15                       | 24.1            | 0.15                       | 0.98           |
| 75               | 29.3         | 15.5            | 0.89                       | 12.5            | 1.71                       | 0.97           |
| 100              | 15.2         | 0.58            | 0.57                       | 7.2             | 1.72                       | 0.95           |
